# Supplementary material for: The Effect of Tanreqing Injection on the Pharmacokinetics of Sirolimus in Rats
Source: Hindawi journal article supplement (doi:10.1155/2019/1854323), 2019-03-10

## Supplementary materials

### The effect of Tanreqing injection on the pharmacokinetics of sirolimus in rats

Fig S1. the experimental protocol

#### HDI investigation groups

##### *Dose investigation:*

- A1: SRL (7.5 mg/kg, i.g.) + TRQ (2.5 mL/kg, i.v.)
- \*A2: SRL (7.5 mg/kg, i.g.) + TRQ (5 mL/kg, i.v.)
- A3: SRL (7.5 mg/kg, i.g.) + TRQ (10 mL/kg, i.v.)

##### *Time-interval investigation:*

- Control group: SRL (7.5 mg/kg, i.g.) alone
- \*B1: SRL (7.5 mg/kg, i.g.) + TRQ (5 mL/kg, i.v.)--time interval: 5 min
- B2: SRL (7.5 mg/kg, i.g.) + TRQ (5 mL/kg, i.v.)--time interval: 2 h
- B3: SRL (7.5 mg/kg, i.g.) + TRQ (5 mL/kg, i.v.)--time interval: 4 h

\*A2 and B1 are the same group.

# Graphic abstract

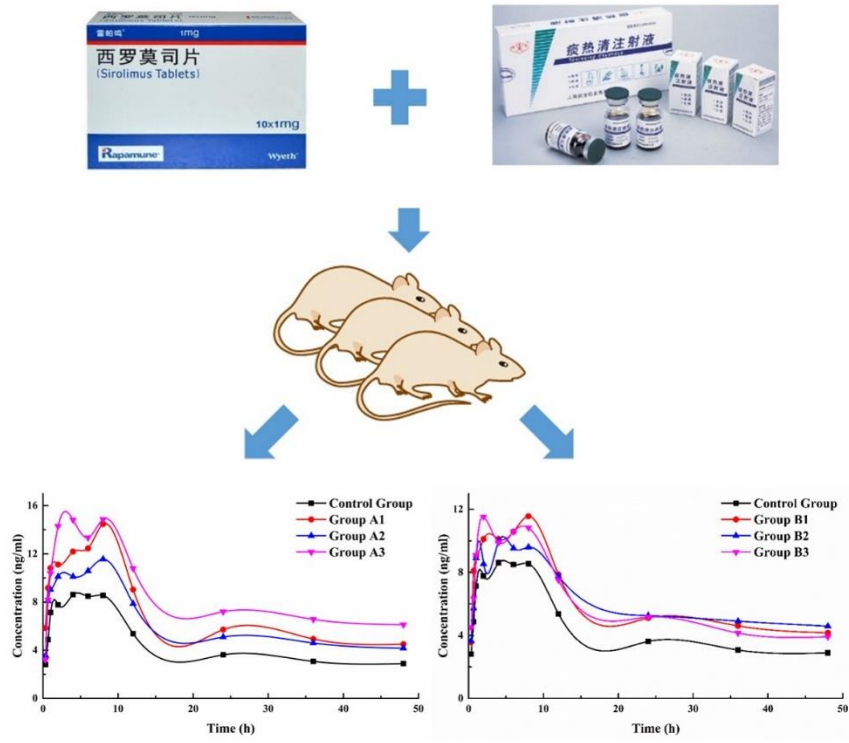

Supplement: f1 [file 1854323.f1.pdf]
